# Supplementary material for: Genetic profile and onset features of 1005 patients with Charcot-Marie-Tooth disease in Japan
Source: PubMed Central journal article supplement — J Neurol Neurosurg Psychiatry. 2018 Sep 26;90(2):195–202. doi: 10.1136/jnnp-2018-318839 (PMC6518473; doi:10.1136/jnnp-2018-318839), 2018-09-26
Supplement: jnnp-2018-318839supp001.pdf [file jnnp-2018-318839supp001.pdf]

**Supplementary table 1** Gene panel list of Illumina MiSeq and Ion Proton

|                                     |               |                |                 |                |                    |              |
|-------------------------------------|---------------|----------------|-----------------|----------------|--------------------|--------------|
| Gene panel for MiSeq (60genes)      | <i>AARS</i>   | <i>APTX</i>    | <i>ARHGEF10</i> | <i>DHH</i>     | <i>DNM2</i>        | <i>EGR2</i>  |
|                                     | <i>FGD4</i>   | <i>FIG4</i>    | <i>GAN</i>      | <i>GARS</i>    | <i>GDAP1</i>       | <i>GJB1</i>  |
|                                     | <i>HARS</i>   | <i>HK1</i>     | <i>HOXD10</i>   | <i>HSPB1</i>   | <i>HSPB8</i>       | <i>KARS</i>  |
|                                     | <i>LITAF</i>  | <i>LMNA</i>    | <i>MARS</i>     | <i>MED25</i>   | <i>MFN2</i>        | <i>MPZ</i>   |
|                                     | <i>MTMR2</i>  | <i>NDRG1</i>   | <i>NEFL</i>     | <i>PMP22</i>   | <i>PRPS1</i>       | <i>PRX</i>   |
|                                     | <i>RAB7A</i>  | <i>SBF2</i>    | <i>SETX</i>     | <i>SH3TC2</i>  | <i>SLC12A6</i>     | <i>SOX10</i> |
|                                     | <i>TDPI</i>   | <i>TRPV4</i>   | <i>TTR</i>      | <i>YARS</i>    | 20 candidate genes |              |
| Gene panel for Ion Proton (72genes) | <i>AARS</i>   | <i>APTX</i>    | <i>ARHGEF10</i> | <i>BSCL2</i>   | <i>DCAF8</i>       | <i>DCTN1</i> |
|                                     | <i>DHH</i>    | <i>DHTKD1</i>  | <i>DNM2</i>     | <i>DYNC1H1</i> | <i>EGR2</i>        | <i>FBLN5</i> |
|                                     | <i>FBXO38</i> | <i>FGD4</i>    | <i>FIG4</i>     | <i>GALC</i>    | <i>GAN</i>         | <i>GARS</i>  |
|                                     | <i>GDAP1</i>  | <i>GJB1</i>    | <i>GJB3</i>     | <i>GNB4</i>    | <i>HARS</i>        | <i>HK1</i>   |
|                                     | <i>HOXD10</i> | <i>HSPB1</i>   | <i>HSPB3</i>    | <i>HSPB8</i>   | <i>IGHMBP2</i>     | <i>INF2</i>  |
|                                     | <i>KARS</i>   | <i>KIF1A</i>   | <i>LITAF</i>    | <i>LMNA</i>    | <i>LRSAMI</i>      | <i>MARS</i>  |
|                                     | <i>MED25</i>  | <i>MFN2</i>    | <i>MME</i>      | <i>MPZ</i>     | <i>MTMR2</i>       | <i>NDRG1</i> |
|                                     | <i>NEFL</i>   | <i>PDK3</i>    | <i>PLEKHG5</i>  | <i>PMP22</i>   | <i>PRPS1</i>       | <i>PRX</i>   |
|                                     | <i>RAB7A</i>  | <i>REEP1</i>   | <i>SACS</i>     | <i>SBF1</i>    | <i>SBF2</i>        | <i>SETX</i>  |
|                                     | <i>SH3TC2</i> | <i>SLC12A6</i> | <i>SLC5A7</i>   | <i>SOX10</i>   | <i>SURF1</i>       | <i>TDPI</i>  |
|                                     | <i>TFG</i>    | <i>TRIM2</i>   | <i>TRPV4</i>    | <i>TTR</i>     | <i>YARS</i>        | <i>COA7</i>  |
| 6 candidate genes                   |               |                |                 |                |                    |              |
